# Supplementary material for: Molecular Changes in Pre-Metastatic Lymph Nodes of Esophageal Cancer Patients
Source: PLoS One. 2014 Jul 21;9(7):e102552. doi: 10.1371/journal.pone.0102552 (PMC4105535; doi:10.1371/journal.pone.0102552)
Supplement: Table S1 — Detailed sample information. (XLSX) [file pone.0102552.s001.xlsx]

## Sheet: Beschreibung
	Sample	Age at surgery	Sex	Tumorlocalisation	Surgical procedure	Lymph node distant tumor	Lymph node close tumor	Tumor classification	Histological type	survival status	pT	pN	pM	Tumor grade	G	Nodal status	nodal microinvolvement	Number of overall micrometastasis detected
pN1	Patient 1	74	m	3	transthoracic esophagectomy, gastric tube with intrathoracic anastomosis	upper mediastinal (1)	Left gastric artery (1)	G3, pT3, pN1 (LNR: 13/26), L1, V1, R0	squamous cell carcinoma	1	3	1	0	III	3	26	0	0
	Patient 2	67	w	3 (distal)	transthoracic esophagectomy, gastric tube with intrathoracic anastomosis	infraclavicular (1)	Hiatal region (1)	G2, pT3, pN1 (LNR: 3/36), pM1a, L1, V0 - tumorfree resection lines.	Adenocarzinoma	0	3	1	1a	II	2	36	2	2
	Patient 3	41	w	2 (middle)	transthoracic esophagectomy, gastric tube with cervical anastomosis	right diaphragmatic (2)	Tracheobronchial (1)	G3, pT3, pN1 (LNR: 1/34), pMX, L1, V0, R0	squamous cell carcinoma	0	3	1	0	III (poorly differentiated)	3	34	0	0
	Patient 4	71	m	1 (proximal)	transthoracic esophagectomy, pharyngogatrostomie	Paracardiac (1)	Upper periesophageal (1)	G2, pT3, pN1 (LNR: 2/26), L1, V0 , R0	Adenocarzinoma	0	3	1	0	II (moderately differentiated)	2	26	0	0
	Patient 5	82	m	3	transthoracic esophagectomy, gastric tube with intrathoracic anastomosis	left gastric artery (4)	right diaphragmatic (1)	G2, pT1, pN1 (LNR: 3/30), L0, V0, R0	Adenocarzinoma	0	1	1	0	II	2	30	0	0
	Patient 6	54	m	3	transthoracic esophagectomy, gastric tube with intrathoracic anastomosis	celiac trunc (3 )	Paracardiac right (1)	G2, pT3, pN1 (LNR: 9/25), pMx, L1, V1,R0	squamous cell carcinoma	1	3	1	0	II	2	25	1	1
	Patient 7	63	m	3	transthoracic esophagectomy, gastric tube with intrathoracic anastomosis	Recurrent nerve (1)	Paracardiac left (1)	G3, pT3, pN1 (LNR: 6/41), pMX, L1, V0, R0	Adenocarzinoma	1	3	1	1a	III	3	41	0	0
	Patient 8	80	m	3	transthoracic esophagectomy, gastric tube with intrathoracic anastomosis	Recurrent nerve (1)	Lesser curvatur (1)	G3, pT3, pN1 (LNR: 4/28), pMx, L1, V0, R0	Adenocarzinoma	0	3	1	0	III	3	28	0	0
	Patient 9	74	m	3	transthoracic esophagectomy, gastric tube with intrathoracic anastomosis	Common hepatic artery (1)	Paracardiac right (1)	G2, pT3, pN1 (LNR: 3/23), pMX, L0, V0, R0	Adenocarzinoma	1	3	1	0	II	2	23	0	0
pN0	Patient 10	50	m	1	transthoracic esophagectomy, gastric tube with cervical anastomosis	Lesser curvature (1)	Paratracheal right (1)	G2, pT2, pN0 (LNR: 0/12), pM1 (Lunge); L0, V0, R0	squamous cell carcinoma	0	2	0	1 (Lung)	II	2	12	0	0
	Patient 11	61	w	3	transthoracic esophagectomy, gastric tube with intrathoracic anastomosis	Splenic artery (1)	Left gastric artery (1)	G3; pT1,pN0 (LNR: 0/42), pMX; L0, V0, R0	Adenocarzinoma	1	1	0	0	III	3	42	0	0
	Patient 12	72	w	3	transthoracic esophagectomy, gastric tube with intrathoracic anastomosis	Common hepatic artery (1)	Lower mediastinal (5)	G2; pT1a, pN0 (LNR: 0/37), L0, V0, R0	Adenocarzinoma	1	1	0	0	II	2	37	0	0
	Patient 13	67	w	3	transthoracic esophagectomy, gastric tube with intrathoracic anastomosis	Common hepatic artery (1)	Lower periesophageal (1)	pT3, pN0 (LNR: 0/54), pMx; G3 L0, V0, R0	Adenocarzinoma	1	3	0	0	III	3	54	0	0
	Patient 14	76	m	3	transthoracic esophagectomy, gastric tube with intrathoracic anastomosis	Common hepatic artery (1)	Paracardiac right (1)	G2, pT1, N0 (LNR: 0/27), MX, R0, L0, V0	squamous cell carcinoma	1	1	0	0	II	2	27	0	0
