# Supplementary material for: Molecular Changes in Pre-Metastatic Lymph Nodes of Esophageal Cancer Patients
Source: PLoS One. 2014 Jul 21;9(7):e102552. doi: 10.1371/journal.pone.0102552 (PMC4105535; doi:10.1371/journal.pone.0102552)
Supplement: Table S3 — Detailed PCR analysis results. (XLSM) [file pone.0102552.s003.xls]

## Sheet: PCR Pub Tabelle
dysregulated in pN1 regional nodes
	pN0 (no metastasis)				pN1 (no metastasis)
Gen	p-value T-test	p-value Wilcoxon	SLR	Fold-Change	p-value T-test	p-value Wilcoxon	SLR	Fold-Change
ISL1	0.0586702	0.0590582	-4.11854	17.3702	0.0563487	0.155132	-3.4349	10.8145
IGF1	0.794657	0.589639	-0.245838	1.18578	0.015595	0.00915169	-1.34596	2.54199
DKK1	0.737437	1	-0.32558	1.25317	0.000250123	0.00915169	-1.8462	3.59552
IGFBP5	0.267674	0.280713	-1.40536	2.64884	0.0270659	0.044011	-1.41201	2.66107
LTF	0.213894	0.280713	-1.15022	2.21947	0.00558392	0.0243902	-1.40332	2.64509
TBX3	0.551216	0.589639	-0.450008	1.36605	0.00204225	0.00915169	-1.14314	2.20862
FOXG1	0.199003	0.105645	-0.93234	0.524008	0.0042385	0.00915169	-1.53573	0.344905
dysregulated in pN0 regional nodes
	pN0 (no metastasis)				pN1 (no metastasis)
Gen	p-value T-test	p-value Wilcoxon	SLR	Fold-Change	p-value T-test	p-value Wilcoxon	SLR	Fold-Change
LAMC2	0.0829069	0.0590582	-1.23157	2.34823	0.529312	0.286321	-0.336508	1.2627
NOVA1	0.106719	0.0590582	-1.03993	2.05613	0.0158975	0.044011	-0.87428	1.83309
L1CAM	0.0998379	0.0590582	-0.767411	1.70221	0.0864301	0.236137	-0.635457	1.55343
EREG	0.154206	0.105645	2.44217	-5.43457	0.0952074	0.123534	-1.59005	3.01059
LILRA5	0.0297432	0.0590582	-1.97345	0.254644	0.941728	0.477197	-0.0519218	0.96465

## Sheet: PCR SLR Data
Sample	LTF	EREG	LAMC2	TBX3	L1CAM	NOVA1	ISL1	IGFBP5	IGF1	DKK1	LILRA5	FOXG1
22.05f	-2.3151	-5.71319	2.26861	-2.64299	0.357704	-2.40246	-6.9247	-3.40988	-3.95718	-1.9001	-4.73316	3.0442
07.08f	-0.39196	-1.69427	-0.374369	-0.938547	-1.12924	-0.500624	0.485663	-0.426357	-2.36364	-1.1875	1.62798	0.68083
14.08f	0.0966835	0.440128	-0.369455	-0.31074	-0.660002	0.198381	1.7694	0.819895	-0.295292	-1.7116	-0.622778	0.327942
18.08f	-1.91697	-1.9688	-3.24654	-2.03824	-0.360241	-0.0650158	-3.12525	-3.57581	-1.59736	-3.5657	1.31159	2.60726
5425II	-3.1401	-0.761631	-1.07942	-0.6178	1.11619	-1.23698	0.865404	-3.02663	-2.3993	-3.0129	-1.29342	1.76019
26.08f	-1.37345	-3.69337	-0.27063	-0.614288	-0.31049	-0.304977	0.839544	-1.29948	-0.277573	-0.9982	0.440907	0.216488
04.09f	-1.72584	-1.94413	-0.722319	-0.635403	-1.91024	-0.681141	-6.72539	-0.582598	-0.351803	-1.5917	1.79366	1.16402
09.09f	0.0983334	3.29873	1.34757	-1.41498	-1.02178	-0.92806	-7.38367	-1.07671	-0.528526	-0.9972	0.89731	3.21304
30.07f	-1.96145	-2.27389	-0.582006	-1.0753	-1.80102	-1.94764	-10.7151	-0.130505	-0.342945	-1.6509	1.0452	0.80759
29.04f	0.904112	2.57041	-1.67819	-0.241293	-1.57316	-1.08137	-1.12467	-3.33533	-1.6443	-1.2023	-0.244602	0.875309
11.07f	-1.99117	3.06008	-0.941494	-0.162878	-0.100286	-0.546625	-4.33808	-0.347183	-0.873751	-1.2497	1.9654	3.03625
20.08f	0.420351	5.29802	0.0355213	1.09392	-0.222281	0.132959	-9.20594	2.32863	3.20919	1.6986	3.32008	0.632088
15.09f	-1.88251	4.08421	-0.516632	0.111279	-0.224321	-0.830893	-0.535696	-2.13558	-0.565634	1.8719	2.45229	-0.750231
19.09f	-3.20186	-2.8019	-3.05708	-3.05107	-1.71701	-2.87372	-5.38832	-3.53736	-1.3547	-2.7464	2.37407	0.868286

## Sheet: MA Expressions
Sample	LK.22.05.fern.CEL	LK.22.05.nah.CEL	LK.07.08.fern.CEL	LK.07.08.nah.CEL	LK.14.08.fern.CEL	LK.14.08.nah.CEL	LK.18.08.fern.CEL	LK.18.08.nah.CEL	X5425.II.CEL	LK.22.08.nah.CEL	LK.26.08.fern.CEL	LK.26.08.nah.CEL	LK.04.09.fern.CEL	LK.04.09.nah.CEL	LK.09.09.fern.CEL	LK.09.09.nah.CEL	LK.30.07.fern.CEL	LK.30.07.nah.CEL	LK.29.04.fern_pN0.CEL	LK.29.04.nah_pN0.CEL	LK.11.07.fern_pN0.CEL	LK.11.07.nah_pN0.CEL	LK.20.08.fern_pN0.CEL	LK.20.08.nah_pN0.CEL	LK.15.09.fern_pN0.CEL	LK.15.09.nah_pN0.CEL	LK.19.09.fern_pN0.CEL	LK.19.09.nah_pN0.CEL
EREG	4.70029	3.11541	4.28681	3.47608	5.52444	5.72723	3.03772	2.87062	4.18305	2.86889	3.1046	3.03341	3.43281	3.10039	3.26991	4.55785	2.48617	3.11375	5.92844	7.6466	3.59287	4.90207	2.93998	4.46563	3.27328	4.36318	2.81798	3.21309
LTF	10.0441	8.4736	7.54518	7.58601	8.5566	8.84593	8.42123	7.36513	9.58622	7.33057	8.66273	7.58662	9.42877	7.88889	8.97906	8.87679	9.89272	8.14637	7.61475	8.94995	10.1296	8.08879	9.0521	8.71099	10.3078	8.56886	9.88522	7.82171
TBX3	6.83175	5.1447	5.86335	4.67406	5.89231	5.73592	6.03306	4.62383	5.81789	5.40397	5.60287	5.24318	5.9778	5.38421	6.44387	5.28524	5.56084	5.23643	7.16323	7.30417	6.66021	6.02165	5.70247	6.33705	5.29582	5.19429	5.29663	4.16037
LAMC2	5.48622	6.9069	5.883	5.54495	6.59309	6.27072	8.75275	6.46833	6.46797	6.03287	6.31487	5.96726	7.13484	6.69305	7.05607	6.85112	6.58203	6.47746	6.6023	6.02328	7.29663	5.80833	7.04375	6.44294	6.51684	5.70968	6.82145	5.74977
NOVA1	7.88918	6.42236	6.65257	6.1439	6.40559	6.74967	5.96546	6.64443	6.55411	5.981	6.43779	6.3259	7.48791	7.04142	7.48885	6.56285	6.9225	6.04529	6.9573	6.48953	7.31442	6.49697	7.22339	6.8442	6.99378	6.09888	6.82309	5.70343
L1CAM	4.87891	5.51026	5.3909	4.56929	5.68741	5.40771	5.07674	5.48909	4.54033	5.77642	5.16121	5.01183	6.75046	4.82472	5.84213	5.29745	6.47686	5.14185	6.23962	5.33077	7.17258	6.1204	6.37798	5.44748	5.91807	5.54652	5.32959	4.9801
ISL1	7.59249	3.67174	4.05214	4.01964	3.43482	3.75212	6.6383	4.64401	3.48323	3.54719	4.19806	3.63754	7.59445	3.8612	7.87105	3.84195	7.17156	3.61001	4.72016	4.82546	5.9382	4.30782	7.25252	3.7373	6.86593	5.48945	6.57003	4.3486
IGFBP5	9.513	7.9868	9.49997	8.90578	7.59694	8.38141	10.1274	7.52065	9.67559	7.7296	8.42914	7.27976	8.21671	7.7146	8.41162	6.62942	7.78256	8.04289	9.66664	7.80569	8.76254	8.19579	7.82854	9.53751	7.36527	7.60802	7.15518	5.17088
IGF1	10.5002	7.73196	10.547	8.30172	8.39014	8.17038	8.30005	7.67216	8.75685	7.20625	7.17115	6.86435	8.14713	7.66456	8.61259	8.07836	7.98183	7.96796	8.83458	7.63669	8.10968	7.84487	7.7592	9.448	8.01259	7.77302	7.79137	7.45763
DKK1	6.36162	5.10978	6.08509	5.28185	5.64874	4.86385	7.40857	4.5348	4.8896	3.82055	5.32478	4.79165	5.71252	5.06712	5.72123	5.17587	5.67522	4.93617	7.44082	7.18441	5.70943	4.6274	5.29376	6.10638	4.47994	5.85389	6.53563	4.52574
LILRA5	9.15497	5.4593	6.54003	7.80252	7.19646	6.91061	5.6208	6.89335	8.68635	7.53532	7.26218	7.51628	5.44407	6.53526	6.31276	6.84981	5.36808	6.60397	8.5267	9.06155	6.22301	7.66456	5.26029	7.05028	5.04251	6.48928	5.00665	7.5392
FOXG1	3.05837	5.03771	4.89152	5.37872	5.8643	6.15403	3.31485	5.27018	4.56037	6.4866	6.80642	6.92433	5.00458	5.58717	4.42131	8.07131	4.42226	5.7787	4.88949	5.97621	5.25582	7.18606	4.61838	5.34765	4.40308	4.48666	4.43098	6.15036

## Sheet: LTF Raw Data
Sample Name	Target Name	Cт	Cт Mean	Cт SD	Target Name	Cт	Cт Mean	Cт SD
22,05n	B2M	20.7121	20.5969	0.0997327	LTF	30.4034	30.3157	0.168518
22,05n	B2M	20.5374	20.5969	0.0997327	LTF	30.4223	30.3157	0.168518
22,05n	B2M	20.5414	20.5969	0.0997327	LTF	30.1215	30.3157	0.168518
22,05f	B2M	21.4626	21.411	0.0452732	LTF	28.8727	28.8147	0.0695733
22,05f	B2M	21.3923	21.411	0.0452732	LTF	28.7376	28.8147	0.0695733
22,05f	B2M	21.378	21.411	0.0452732	LTF	28.8337	28.8147	0.0695733
07,08n	B2M	20.7656	20.6644	0.138466	LTF	31.5985	31.4763	0.111161
07,08n	B2M	20.5066	20.6644	0.138466	LTF	31.4493	31.4763	0.111161
07,08n	B2M	20.721	20.6644	0.138466	LTF	31.3811	31.4763	0.111161
07,08f	B2M	20.913	20.9014	0.037198	LTF	31.3834	31.3213	0.0985485
07,08f	B2M	20.8597	20.9014	0.037198	LTF	31.3728	31.3213	0.0985485
07,08f	B2M	20.9313	20.9014	0.037198	LTF	31.2077	31.3213	0.0985485
14,08n	B2M	20.3397	20.2946	0.0427797	LTF	29.9746	29.8506	0.109453
14,08n	B2M	20.2546	20.2946	0.0427797	LTF	29.7675	29.8506	0.109453
14,08n	B2M	20.2896	20.2946	0.0427797	LTF	29.8096	29.8506	0.109453
14,08f	B2M	20.0814	20.0923	0.0289579	LTF	29.731	29.7449	0.0124119
14,08f	B2M	20.1251	20.0923	0.0289579	LTF	29.7488	29.7449	0.0124119
14,08f	B2M	20.0704	20.0923	0.0289579	LTF	29.755	29.7449	0.0124119
18,08n	B2M	19.7654	19.494	0.266194	LTF	31.0383	31.129	0.119581
18,08n	B2M	19.2333	19.494	0.266194	LTF	31.0841	31.129	0.119581
18,08n	B2M	19.4833	19.494	0.266194	LTF	31.2645	31.129	0.119581
18,08f	B2M	19.6546	19.611	0.0754081	LTF	29.4562	29.3289	0.132007
18,08f	B2M	19.5239	19.611	0.0754081	LTF	29.1927	29.3289	0.132007
18,08f	B2M	19.6543	19.611	0.0754081	LTF	29.338	29.3289	0.132007
22,08n	B2M	19.9921	19.9524	0.0366725	LTF	31.7408	31.7697	0.0985253
22,08n	B2M	19.9451	19.9524	0.0366725	LTF	31.8795	31.7697	0.0985253
22,08n	B2M	19.9198	19.9524	0.0366725	LTF	31.6889	31.7697	0.0985253
5425 II	B2M	20.2298	20.1229	0.171785	LTF	29.0126	28.8002	0.220868
5425 II	B2M	19.9248	20.1229	0.171785	LTF	28.5718	28.8002	0.220868
5425 II	B2M	20.2142	20.1229	0.171785	LTF	28.8163	28.8002	0.220868
26,08n	B2M	19.9748	19.9319	0.0589582	LTF	31.2331	31.2877	0.0715255
26,08n	B2M	19.8647	19.9319	0.0589582	LTF	31.2614	31.2877	0.0715255
26,08n	B2M	19.9563	19.9319	0.0589582	LTF	31.3687	31.2877	0.0715255
26,08f	B2M	19.7616	19.7942	0.0496535	LTF	29.6994	29.7766	0.0919044
26,08f	B2M	19.8514	19.7942	0.0496535	LTF	29.8783	29.7766	0.0919044
26,08f	B2M	19.7697	19.7942	0.0496535	LTF	29.7522	29.7766	0.0919044
04,09n	B2M	20.0287	20.0168	0.0451579	LTF	31.3907	31.1477	0.22021
04,09n	B2M	20.0548	20.0168	0.0451579	LTF	31.0909	31.1477	0.22021
04,09n	B2M	19.9669	20.0168	0.0451579	LTF	30.9614	31.1477	0.22021
04,09f	B2M	20.1832	20.1493	0.210188	LTF	29.5155	29.5543	0.064718
04,09f	B2M	19.9242	20.1493	0.210188	LTF	29.629	29.5543	0.064718
04,09f	B2M	20.3405	20.1493	0.210188	LTF	29.5185	29.5543	0.064718
29,04n					LTF	30.497	30.4361	0.123467
29,04n	b2	21.1771	21.059	0.167022	LTF	30.5173	30.4361	0.123467
29,04n	b2	20.9409	21.059	0.167022	LTF	30.294	30.4361	0.123467
29,04f	b2	21.5677	21.4117	0.138417	LTF	31.7601	31.693	0.0600044
29,04f	b2	21.364	21.4117	0.138417	LTF	31.6445	31.693	0.0600044
29,04f	b2	21.3035	21.4117	0.138417	LTF	31.6744	31.693	0.0600044
11,07n	b2	20.3355	20.1887	0.133174	LTF	30.8563	30.8359	0.0545948
11,07n	b2	20.0756	20.1887	0.133174	LTF	30.7741	30.8359	0.0545948
11,07n	b2	20.1551	20.1887	0.133174	LTF	30.8774	30.8359	0.0545948
11,07f	b2	20.9712	20.9326	0.0411589	LTF	29.5844	29.5887	0.0326395
11,07f	b2	20.8893	20.9326	0.0411589	LTF	29.6233	29.5887	0.0326395
11,07f	b2	20.9375	20.9326	0.0411589	LTF	29.5584	29.5887	0.0326395
20,08n	b2	21.3164	21.1263	0.16472	LTF	30.4072	30.2462	0.139379
20,08n	b2	21.0363	21.1263	0.16472	LTF	30.1664	30.2462	0.139379
20,08n	b2	21.0263	21.1263	0.16472	LTF	30.1651	30.2462	0.139379
20,08f	b2	20.1129	20.038	0.0724823	LTF	29.4683	29.5783	0.0988639
20,08f	b2	20.0331	20.038	0.0724823	LTF	29.6599	29.5783	0.0988639
20,08f	b2	19.9682	20.038	0.0724823	LTF	29.6067	29.5783	0.0988639
15,09n	b2	20.613	20.3808	0.240222	LTF	30.0805	30.0914	0.00997332
15,09n	b2	20.1333	20.3808	0.240222	LTF	30.0935	30.0914	0.00997332
15,09n	b2	20.3961	20.3808	0.240222	LTF	30.1002	30.0914	0.00997332
15,09f	b2	20.6824	20.7052	0.0507152	LTF	28.6282	28.5332	0.0833105
15,09f	b2	20.6698	20.7052	0.0507152	LTF	28.4723	28.5332	0.0833105
15,09f	b2	20.7633	20.7052	0.0507152	LTF	28.4993	28.5332	0.0833105
19,09n	b2	19.9462	19.9144	0.0285656	LTF	31.8826	31.8719	0.0325918
19,09n	b2	19.8909	19.9144	0.0285656	LTF	31.8978	31.8719	0.0325918
19,09n	b2	19.9061	19.9144	0.0285656	LTF	31.8353	31.8719	0.0325918
19,09f	b2	19.8574	19.8979	0.0918074	LTF	28.8169	28.6535	0.154176
19,09f	b2	20.003	19.8979	0.0918074	LTF	28.5105	28.6535	0.154176
19,09f	b2	19.8333	19.8979	0.0918074	LTF	28.6331	28.6535	0.154176
09,09n	b2	20.6839	20.5012	0.159053	LTF	30.0845	30.1242	0.0369116
09,09n	b2	20.3942	20.5012	0.159053	LTF	30.1307	30.1242	0.0369116
09,09n	b2	20.4254	20.5012	0.159053	LTF	30.1575	30.1242	0.0369116
09,09f	b2	21.1412	21.1121	0.0386503	LTF	30.7421	30.8335	0.121903
09,09f	b2	21.1268	21.1121	0.0386503	LTF	30.9719	30.8335	0.121903
09,09f	b2	21.0682	21.1121	0.0386503	LTF	30.7864	30.8335	0.121903
30,07n	b2	20.0496	19.9454	0.0903274	LTF	30.8653	30.855	0.0119544
30,07n	b2	19.8957	19.9454	0.0903274	LTF	30.8576	30.855	0.0119544
30,07n	b2	19.8908	19.9454	0.0903274	LTF	30.8419	30.855	0.0119544
30,07f	b2	20.2763	20.1646	0.159053	LTF	29.1351	29.1127	0.0296871
30,07f	b2	19.9825	20.1646	0.159053	LTF	29.124	29.1127	0.0296871
30,07f	b2	20.235	20.1646	0.159053	LTF	29.079	29.1127	0.0296871

## Sheet: EREG Raw Data
Sample Name	Target Name	Cт	Cт Mean	Cт SD
22,05n	B2M	20.6704	20.4655	0.197493
22,05n	B2M	20.4498	20.4655	0.197493
22,05n	B2M	20.2763	20.4655	0.197493
22,05f	B2M	21.3827	21.1262	0.22617
22,05f	B2M	21.04	21.1262	0.22617
22,05f	B2M	20.9558	21.1262	0.22617
07,08n	B2M	20.2602	20.4194	0.186297
07,08n	B2M	20.6243	20.4194	0.186297
07,08n	B2M	20.3737	20.4194	0.186297
07,08f	B2M	20.9036	20.8875	0.0587394
07,08f	B2M	20.8225	20.8875	0.0587394
07,08f	B2M	20.9366	20.8875	0.0587394
22,05n	EREG	37.1217	36.2256	0.79155
22,05n	EREG	35.9335	36.2256	0.79155
22,05n	EREG	35.6216	36.2256	0.79155
22,05f	EREG	31.2291	31.173	0.281369
22,05f	EREG	30.8678	31.173	0.281369
22,05f	EREG	31.4221	31.173	0.281369
07,08n	EREG	33.3979	33.098	0.340135
07,08n	EREG	32.7284	33.098	0.340135
07,08n	EREG	33.1678	33.098	0.340135
07,08f	EREG	32.03	31.8719	0.371901
07,08f	EREG	31.4471	31.8719	0.371901
07,08f	EREG	32.1386	31.8719	0.371901
14,08n	B2M	20.2477	20.2067	0.0568527
14,08n	B2M	20.1418	20.2067	0.0568527
14,08n	B2M	20.2306	20.2067	0.0568527
14,08f	B2M	20.1111	20.0804	0.0554536
14,08f	B2M	20.0164	20.0804	0.0554536
14,08f	B2M	20.1137	20.0804	0.0554536
18,08n	B2M	19.5738	19.4432	0.143298
18,08n	B2M	19.2899	19.4432	0.143298
18,08n	B2M	19.466	19.4432	0.143298
18,08f	B2M	19.5194	19.4535	0.0712239
18,08f	B2M	19.4633	19.4535	0.0712239
18,08f	B2M	19.3779	19.4535	0.0712239
14,08n	EREG	31.4784	31.0839	0.40707
14,08n	EREG	30.6653	31.0839	0.40707
14,08n	EREG	31.1079	31.0839	0.40707
14,08f	EREG	30.9522	31.3977	0.39452
14,08f	EREG	31.538	31.3977	0.39452
14,08f	EREG	31.7029	31.3977	0.39452
18,08n	EREG	35.2857	35.3351	0.0699462
18,08n	EREG	35.3846	35.3351	0.0699462
18,08f	EREG	33.4158	33.3766	0.359542
18,08f	EREG	32.9991	33.3766	0.359542
18,08f	EREG	33.715	33.3766	0.359542
22,08n	B2M	19.9489	19.8817	0.0832665
22,08n	B2M	19.9077	19.8817	0.0832665
22,08n	B2M	19.7886	19.8817	0.0832665
22,08f	B2M	19.659	19.5885	0.0811452
22,08f	B2M	19.4998	19.5885	0.0811452
22,08f	B2M	19.6066	19.5885	0.0811452
26,08n	B2M	19.7999	19.6911	0.107287
26,08n	B2M	19.688	19.6911	0.107287
26,08n	B2M	19.5853	19.6911	0.107287
26,08f	B2M	20.2141	20.2485	0.0298527
26,08f	B2M	20.2649	20.2485	0.0298527
26,08f	B2M	20.2666	20.2485	0.0298527
22,08n	EREG	34.4254	34.7828	0.336611
22,08n	EREG	34.829	34.7828	0.336611
22,08n	EREG	35.0939	34.7828	0.336611
22,08f	EREG	33.7122	33.7279	0.119685
22,08f	EREG	33.6169	33.7279	0.119685
22,08f	EREG	33.8547	33.7279	0.119685
26,08n	EREG	34.3787	34.8828	0.437837
26,08n	EREG	35.1685	34.8828	0.437837
26,08n	EREG	35.1012	34.8828	0.437837
26,08f	EREG	32.0574	31.6468	0.37579
26,08f	EREG	31.5632	31.6468	0.37579
26,08f	EREG	31.3199	31.6468	0.37579
04,09n	B2M	19.9839	19.959	0.0242116
04,09n	B2M	19.9574	19.959	0.0242116
04,09n	B2M	19.9356	19.959	0.0242116
04,09f	B2M	19.9254	19.9344	0.325981
04,09f	B2M	19.6131	19.9344	0.325981
04,09f	B2M	20.2648	19.9344	0.325981
04,09n	EREG	35.8919	35.8888	0.0717082
04,09n	EREG	35.8156	35.8888	0.0717082
04,09n	EREG	35.9589	35.8888	0.0717082
04,09f	EREG	33.9196	33.9201	0.321377
04,09f	EREG	34.2418	33.9201	0.321377
04,09f	EREG	33.599	33.9201	0.321377
29,04n	B2M	20.8598	20.835	0.056422
29,04n	B2M	20.7704	20.835	0.056422
29,04n	B2M	20.8748	20.835	0.056422
29,04f	B2M	21.0954	21.0842	0.0138123
29,04f	B2M	21.0886	21.0842	0.0138123
29,04f	B2M	21.0688	21.0842	0.0138123
11,07n	B2M	19.9312	19.8839	0.0697089
11,07n	B2M	19.8039	19.8839	0.0697089
11,07n	B2M	19.9168	19.8839	0.0697089
11,07f	B2M	20.5225	20.5479	0.0279259
11,07f	B2M	20.5778	20.5479	0.0279259
11,07f	B2M	20.5434	20.5479	0.0279259
29,04n	EREG	24.9335	25.0491	0.995653
29,04n	EREG	24.1163	25.0491	0.995653
29,04n	EREG	26.0976	25.0491	0.995653
29,04f	EREG	28.8194	27.8688	0.832271
29,04f	EREG	27.5157	27.8688	0.832271
29,04f	EREG	27.2713	27.8688	0.832271
11,07n	EREG	28.5922	26.8415	2.44939
11,07n	EREG	24.0424	26.8415	2.44939
11,07n	EREG	27.8899	26.8415	2.44939
11,07f	EREG	31.2402	30.5655	0.584895
11,07f	EREG	30.202	30.5655	0.584895
11,07f	EREG	30.2544	30.5655	0.584895
20,08n	B2M	20.8827	20.8369	0.0471936
20,08n	B2M	20.8396	20.8369	0.0471936
20,08n	B2M	20.7884	20.8369	0.0471936
20,08f	B2M	19.8399	19.802	0.0357465
20,08f	B2M	19.7974	19.802	0.0357465
20,08f	B2M	19.7688	19.802	0.0357465
15,09f	B2M	20.4924	20.3902	0.0993953
15,09n	B2M	19.9758	20.0711	0.0825673
15,09n	B2M	20.1179	20.0711	0.0825673
15,09n	B2M	20.1197	20.0711	0.0825673
15,09f	B2M	20.2938	20.3902	0.0993953
15,09f	B2M	20.3844	20.3902	0.0993953
20,08n	EREG	27.737	27.9999	1.68408
20,08n	EREG	26.4628	27.9999	1.68408
20,08n	EREG	29.8	27.9999	1.68408
20,08f	EREG	26.004	32.2631	5.55459
20,08f	EREG	34.1795	32.2631	5.55459
20,08f	EREG	36.6057	32.2631	5.55459
15,09f	EREG	29.5504	30.2661	0.998514
15,09n	EREG	23.7558	25.8629	2.24994
15,09n	EREG	28.2326	25.8629	2.24994
15,09n	EREG	25.6002	25.8629	2.24994
15,09f	EREG	31.4068	30.2661	0.998514
15,09f	EREG	29.8412	30.2661	0.998514
19,09n	B2M	19.7818	19.7002	0.0709136
19,09n	B2M	19.6539	19.7002	0.0709136
19,09n	B2M	19.6648	19.7002	0.0709136
19,09f	B2M	19.5834	19.4697	0.1098
19,09f	B2M	19.3643	19.4697	0.1098
19,09f	B2M	19.4614	19.4697	0.1098
09,09n	B2M	20.1625	20.1747	0.0175967
09,09n	B2M	20.1666	20.1747	0.0175967
09,09n	B2M	20.1948	20.1747	0.0175967
09,09f	B2M	20.8275	20.8005	0.0236218
09,09f	B2M	20.7838	20.8005	0.0236218
09,09f	B2M	20.7902	20.8005	0.0236218
19,09n	EREG	Undetermined	34.8385	0.606745
19,09n	EREG	34.4094	34.8385	0.606745
19,09n	EREG	35.2675	34.8385	0.606745
19,09f	EREG	32.3577	31.8061	0.441681
19,09f	EREG	31.3315	31.8061	0.441681
19,09f	EREG	31.9299	31.8061	0.441681
09,09n	EREG	28.7612	29.0505	0.270573
09,09n	EREG	29.2974	29.0505	0.270573
09,09n	EREG	29.0929	29.0505	0.270573
09,09f	EREG	Undetermined	32.9751
09,09f	EREG	32.9751	32.9751
09,09f	EREG	Undetermined	32.9751
30,07n	B2M	19.8654	19.8081	0.0675432
30,07n	B2M	19.7336	19.8081	0.0675432
30,07n	B2M	19.8252	19.8081	0.0675432
30,07f	B2M	19.9776	19.9494	0.129332
30,07f	B2M	19.8084	19.9494	0.129332
30,07f	B2M	20.0624	19.9494	0.129332
30,07n	EREG	33.8211	34.6136	1.12082
30,07n	EREG	35.4062	34.6136	1.12082
30,07n	EREG	Undetermined	34.6136	1.12082
30,07f	EREG	32.7912	32.4811	1.40002
30,07f	EREG	30.952	32.4811	1.40002
30,07f	EREG	33.7001	32.4811	1.40002
19,09f	EREG	31.6051	31.8061	0.441681

## Sheet: TBX3 Raw Data
Sample Name	Target Name	Cт	Cт Mean	Cт SD	Target Name	Cт	Cт Mean	Cт SD
22.05n	B2M	20.9615	20.873	0.136879	TBX3	33.0579	32.8392	0.285423
22.05n	B2M	20.9421	20.873	0.136879	TBX3	32.9433	32.8392	0.285423
22.05n	B2M	20.7153	20.873	0.136879	TBX3	32.5163	32.8392	0.285423
22.05f	B2M	21.7793	21.5788	0.174036	TBX3	30.8722	30.9021	0.0335265
22.05f	B2M	21.466	21.5788	0.174036	TBX3	30.8957	30.9021	0.0335265
22.05f	B2M	21.4913	21.5788	0.174036	TBX3	30.9383	30.9021	0.0335265
07.08n	B2M	21.0942	21.0512	0.0372234	TBX3	32.8788	32.8514	0.0490323
07.08n	B2M	21.0311	21.0512	0.0372234	TBX3	32.7948	32.8514	0.0490323
07.08n	B2M	21.0283	21.0512	0.0372234	TBX3	32.8806	32.8514	0.0490323
07.08f	B2M	20.9785	21.1877	0.189661	TBX3	32.0658	32.0494	0.0254897
07.08f	B2M	21.236	21.1877	0.189661	TBX3	32.02	32.0494	0.0254897
07.08f	B2M	21.3485	21.1877	0.189661	TBX3	32.0623	32.0494	0.0254897
14.08n	B2M	20.732	20.7024	0.0452843	TBX3	32.5523	32.3322	0.195122
14.08n	B2M	20.6503	20.7024	0.0452843	TBX3	32.2639	32.3322	0.195122
14.08n	B2M	20.7249	20.7024	0.0452843	TBX3	32.1804	32.3322	0.195122
14.08f	B2M	20.4765	20.4637	0.0560376	TBX3	31.7424	31.7827	0.117392
14.08f	B2M	20.5121	20.4637	0.0560376	TBX3	31.6908	31.7827	0.117392
14.08f	B2M	20.4023	20.4637	0.0560376	TBX3	31.915	31.7827	0.117392
18.08n	B2M	19.9971	19.8968	0.105839	TBX3	32.5205	32.5495	0.0725633
18.08n	B2M	19.9071	19.8968	0.105839	TBX3	32.4959	32.5495	0.0725633
18.08n	B2M	19.7862	19.8968	0.105839	TBX3	32.632	32.5495	0.0725633
18.08f	B2M	19.5877	19.844	0.222968	TBX3	30.4501	30.4584	0.0429193
18.08f	B2M	19.9934	19.844	0.222968	TBX3	30.4203	30.4584	0.0429193
18.08f	B2M	19.9508	19.844	0.222968	TBX3	30.5049	30.4584	0.0429193
22.08n	B2M	20.3949	20.3215	0.0636598	TBX3	32.0316	31.9062	0.271989
22.08n	B2M	20.2807	20.3215	0.0636598	TBX3	32.0928	31.9062	0.271989
22.08n	B2M	20.2889	20.3215	0.0636598	TBX3	31.5941	31.9062	0.271989
5425II	B2M	20.6271	20.5651	0.0550776	TBX3	31.4781	31.532	0.148205
5425II	B2M	20.5466	20.5651	0.0550776	TBX3	31.4183	31.532	0.148205
5425II	B2M	20.5217	20.5651	0.0550776	TBX3	31.6996	31.532	0.148205
26.08n	B2M	19.7613	20.0598	0.260894	TBX3	32.6033	32.6788	0.198693
26.08n	B2M	20.1744	20.0598	0.260894	TBX3	32.5289	32.6788	0.198693
26.08n	B2M	20.2439	20.0598	0.260894	TBX3	32.9042	32.6788	0.198693
26.08f	B2M	20.1327	20.0739	0.119802	TBX3	31.9622	32.0786	0.103503
26.08f	B2M	19.936	20.0739	0.119802	TBX3	32.113	32.0786	0.103503
26.08f	B2M	20.1529	20.0739	0.119802	TBX3	32.1605	32.0786	0.103503
04.09n	B2M	20.509	20.3719	0.18896	TBX3	32.7166	32.675	0.0404426
04.09n	B2M	20.4503	20.3719	0.18896	TBX3	32.6358	32.675	0.0404426
04.09n	B2M	20.1563	20.3719	0.18896	TBX3	32.6725	32.675	0.0404426
04.09f	B2M	20.4838	20.4541	0.325808	TBX3	32.0586	32.1218	0.123322
04.09f	B2M	20.1145	20.4541	0.325808	TBX3	32.2639	32.1218	0.123322
04.09f	B2M	20.7641	20.4541	0.325808	TBX3	32.043	32.1218	0.123322
B2M neg	B2M	Undetermined
TBX3 neg	TBX3	Undetermined
29.04n	B2M	20.9559	20.8751	0.0769445	TBX3	30.9501	31.023	0.101373
29.04n	B2M	20.8666	20.8751	0.0769445	TBX3	31.1388	31.023	0.101373
29.04n	B2M	20.8027	20.8751	0.0769445	TBX3	30.9801	31.023	0.101373
29.04f	B2M	21.0875	21.1126	0.0302217	TBX3	31.0129	31.0192	0.0124096
29.04f	B2M	21.1041	21.1126	0.0302217	TBX3	31.0113	31.0192	0.0124096
29.04f	B2M	21.1461	21.1126	0.0302217	TBX3	31.0335	31.0192	0.0124096
11.07n	B2M	19.9766	19.9621	0.0275333	TBX3	31.2278	31.1493	0.0813402
11.07n	B2M	19.9304	19.9621	0.0275333	TBX3	31.0654	31.1493	0.0813402
11.07n	B2M	19.9794	19.9621	0.0275333	TBX3	31.1548	31.1493	0.0813402
11.07f	B2M	20.5	20.6064	0.105138	TBX3	31.6213	31.6307	0.0602188
11.07f	B2M	20.6089	20.6064	0.105138	TBX3	31.5757	31.6307	0.0602188
11.07f	B2M	20.7103	20.6064	0.105138	TBX3	31.6951	31.6307	0.0602188
20.08n	B2M	20.8429	20.8673	0.0213352	TBX3	31.446	31.3124	0.115786
20.08n	B2M	20.8762	20.8673	0.0213352	TBX3	31.2445	31.3124	0.115786
20.08n	B2M	20.8827	20.8673	0.0213352	TBX3	31.2465	31.3124	0.115786
20.08f	B2M	19.9001	19.8259	0.104178	TBX3	31.2095	31.3649	0.176924
20.08f	B2M	19.8707	19.8259	0.104178	TBX3	31.3276	31.3649	0.176924
20.08f	B2M	19.7068	19.8259	0.104178	TBX3	31.5574	31.3649	0.176924
15.09n	B2M	20.2953	20.1504	0.130842	TBX3	32.327	32.2736	0.05079
15.09n	B2M	20.0408	20.1504	0.130842	TBX3	32.268	32.2736	0.05079
15.09n	B2M	20.1152	20.1504	0.130842	TBX3	32.2258	32.2736	0.05079
15.09f	B2M	20.2961	20.384	0.112449	TBX3	32.9485	32.6185	0.288842
15.09f	B2M	20.3453	20.384	0.112449	TBX3	32.4951	32.6185	0.288842
15.09f	B2M	20.5107	20.384	0.112449	TBX3	32.4118	32.6185	0.288842
19.09n	B2M	19.8972	19.7872	0.127663	TBX3	35.7384	35.5912	0.18352
19.09n	B2M	19.6472	19.7872	0.127663	TBX3	35.6497	35.5912	0.18352
19.09n	B2M	19.8173	19.7872	0.127663	TBX3	35.3856	35.5912	0.18352
19.09f	B2M	19.4822	19.5063	0.0671429	TBX3	32.3087	32.2593	0.0513139
19.09f	B2M	19.4546	19.5063	0.0671429	TBX3	32.2063	32.2593	0.0513139
19.09f	B2M	19.5822	19.5063	0.0671429	TBX3	32.2629	32.2593	0.0513139
09.09n	B2M	20.3362	20.2445	0.0814535	TBX3	32.5904	32.5366	0.0709841
09.09n	B2M	20.2167	20.2445	0.0814535	TBX3	32.5631	32.5366	0.0709841
09.09n	B2M	20.1806	20.2445	0.0814535	TBX3	32.4561	32.5366	0.0709841
09.09f	B2M	20.8516	20.8295	0.06788	TBX3	31.7904	31.7066	0.0785585
09.09f	B2M	20.7534	20.8295	0.06788	TBX3	31.6948	31.7066	0.0785585
09.09f	B2M	20.8837	20.8295	0.06788	TBX3	31.6347	31.7066	0.0785585
30.07n	B2M	19.8679	19.8286	0.0391574	TBX3	33.2042	33.2024	0.0449385
30.07n	B2M	19.8282	19.8286	0.0391574	TBX3	33.2464	33.2024	0.0449385
30.07n	B2M	19.7896	19.8286	0.0391574	TBX3	32.2879	32.2446	0.0796441
30.07f	B2M	19.946	19.9461	0.129546	TBX3	32.2932	32.2446	0.0796441
30.07f	B2M	19.8166	19.9461	0.129546	TBX3	32.1527	32.2446	0.0796441
30.07f	B2M	20.0757	19.9461	0.129546	TBX3	33.1566	33.2024	0.0449385
B2M neg	B2M	Undetermined
TBX3 neg	TBX3	Undetermined

## Sheet: LAMC2 Raw Data
Sample Name	Target Name	Cт	Cт Mean	Cт SD	Target Name	Cт	Cт Mean	Cт SD
22,05n	B2M	20.9446	20.5992	0.300968	LAMC2	31.3595	31.3261	0.10425
22,05n	B2M	20.3932	20.5992	0.300968	LAMC2	31.4097	31.3261	0.10425
22,05n	B2M	20.4599	20.5992	0.300968	LAMC2	31.2093	31.3261	0.10425
22,05f	B2M	21.6949	21.434	0.226327	LAMC2	34.4144	34.4295	0.0500908
22,05f	B2M	21.3157	21.434	0.226327	LAMC2	34.4854	34.4295	0.0500908
22,05f	B2M	21.2912	21.434	0.226327	LAMC2	34.3886	34.4295	0.0500908
07,08n	B2M	20.6732	20.6634	0.056594	LAMC2	32.5676	32.4744	0.116414
07,08n	B2M	20.7145	20.6634	0.056594	LAMC2	32.3439	32.4744	0.116414
07,08n	B2M	20.6026	20.6634	0.056594	LAMC2	32.5117	32.4744	0.116414
07,08f	B2M	20.8374	21.0673	0.200102	LAMC2	32.3443	32.5039	0.140787
07,08f	B2M	21.1628	21.0673	0.200102	LAMC2	32.6104	32.5039	0.140787
07,08f	B2M	21.2018	21.0673	0.200102	LAMC2	32.5571	32.5039	0.140787
14,08n	B2M	20.6303	20.4695	0.232412	LAMC2	31.9091	31.7245	0.171278
14,08n	B2M	20.203	20.4695	0.232412	LAMC2	31.6939	31.7245	0.171278
14,08n	B2M	20.5751	20.4695	0.232412	LAMC2	31.5707	31.7245	0.171278
14,08f	B2M	20.3417	20.2264	0.231798	LAMC2	31.1053	31.112	0.0708606
14,08f	B2M	20.3779	20.2264	0.231798	LAMC2	31.186	31.112	0.0708606
14,08f	B2M	19.9595	20.2264	0.231798	LAMC2	31.0448	31.112	0.0708606
18,08n	B2M	19.9231	19.82	0.146242	LAMC2	31.1941	31.1562	0.0708709
18,08n	B2M	19.6526	19.82	0.146242	LAMC2	31.0745	31.1562	0.0708709
18,08n	B2M	19.8843	19.82	0.146242	LAMC2	31.2001	31.1562	0.0708709
18,08f	B2M	19.882	19.9088	0.0295235	LAMC2	28.0787	27.9986	0.0700628
18,08f	B2M	19.9041	19.9088	0.0295235	LAMC2	27.949	27.9986	0.0700628
18,08f	B2M	19.9405	19.9088	0.0295235	LAMC2	27.968	27.9986	0.0700628
22,08n	B2M	19.9638	20.0504	0.0824497	LAMC2	32.3094	32.2406	0.0607587
22,08n	B2M	20.0594	20.0504	0.0824497	LAMC2	32.218	32.2406	0.0607587
22,08n	B2M	20.1279	20.0504	0.0824497	LAMC2	32.1943	32.2406	0.0607587
5425 II	B2M	20.6429	20.3561	0.365158	LAMC2	31.5301	31.4669	0.0864233
5425 II	B2M	19.945	20.3561	0.365158	LAMC2	31.3684	31.4669	0.0864233
5425 II	B2M	20.4804	20.3561	0.365158	LAMC2	31.5022	31.4669	0.0864233
26,08n	B2M	20.1367	20.1622	0.057802	LAMC2	32.1195	32.074	0.110113
26,08n	B2M	20.2284	20.1622	0.057802	LAMC2	31.9485	32.074	0.110113
26,08n	B2M	20.1216	20.1622	0.057802	LAMC2	32.1541	32.074	0.110113
26,08f	B2M	20.064	20.0465	0.0203772	LAMC2	31.5715	31.6877	0.109685
26,08f	B2M	20.0242	20.0465	0.0203772	LAMC2	31.7895	31.6877	0.109685
26,08f	B2M	20.0513	20.0465	0.0203772	LAMC2	31.702	31.6877	0.109685
04,09n	B2M	20.1452	20.1369	0.138003	LAMC2	31.9513	31.7108	0.208253
04,09n	B2M	20.2706	20.1369	0.138003	LAMC2	31.5888	31.7108	0.208253
04,09n	B2M	19.995	20.1369	0.138003	LAMC2	31.5923	31.7108	0.208253
04,09f	B2M	20.5069	20.2376	0.265899	LAMC2	31.1782	31.0891	0.0781983
04,09f	B2M	19.9753	20.2376	0.265899	LAMC2	31.0572	31.0891	0.0781983
04,09f	B2M	20.2305	20.2376	0.265899	LAMC2	31.0319	31.0891	0.0781983
B2M-neg	B2M	Undetermined
LAMC2-neg	LAMC2	Undetermined
29,04n	B2M	16.0797	15.3756	0.623621	LAMC2	32.5105	32.4878	0.201546
29,04n	B2M	14.8929	15.3756	0.623621	LAMC2	32.6771	32.4878	0.201546
29,04n	B2M	15.1541	15.3756	0.623621	LAMC2	32.2759	32.4878	0.201546
29,04f	B2M	16.4561	16.3137	1.0709	LAMC2	31.9038	31.7478	0.136118
29,04f	B2M	14.4753	16.3137	1.0709	LAMC2	31.653	31.7478	0.136118
29,04f	B2M	16.1714	16.3137	1.0709	LAMC2	31.6866	31.7478	0.136118
11,07n	B2M	14.5176	14.4289	0.0851154	LAMC2	31.5375	31.4956	0.118614
11,07n	B2M	14.3479	14.4289	0.0851154	LAMC2	31.3618	31.4956	0.118614
11,07n	B2M	14.4212	14.4289	0.0851154	LAMC2	31.5876	31.4956	0.118614
11,07f	B2M	14.938	15.0698	0.791638	LAMC2	31.0968	31.195	0.0871969
11,07f	B2M	14.3523	15.0698	0.791638	LAMC2	31.2633	31.195	0.0871969
11,07f	B2M	15.919	15.0698	0.791638	LAMC2	31.225	31.195	0.0871969
20,08n	B2M	14.3968	15.0431	1.21815	LAMC2	31.4257	31.1707	0.198037
20,08n	B2M	15.8716	15.0431	1.21815	LAMC2	31.2333	31.1707	0.198037
20,08n	B2M	12.4792	15.0431	1.21815	LAMC2	31.2796	31.1707	0.198037
20,08n	B2M	14.558	15.0431	1.21815	LAMC2	30.8818	31.1707	0.198037
20,08n	B2M	14.667	15.0431	1.21815	LAMC2	31.2078	31.1707	0.198037
20,08n	B2M	15.7218	15.0431	1.21815	LAMC2	30.9961	31.1707	0.198037
20,08f	B2M	14.5131	14.5518	0.20858	LAMC2	30.587	30.7149	0.119023
20,08f	B2M	14.777	14.5518	0.20858	LAMC2	30.7356	30.7149	0.119023
20,08f	B2M	14.3652	14.5518	0.20858	LAMC2	30.8223	30.7149	0.119023
15,09n	B2M	15.4564	15.0864	0.651383	LAMC2	32.0532	31.9515	0.089041
15,09n	B2M	14.3343	15.0864	0.651383	LAMC2	31.8874	31.9515	0.089041
15,09n	B2M	15.4685	15.0864	0.651383	LAMC2	31.914	31.9515	0.089041
15,09f	B2M	15.5006	14.8026	0.621522	LAMC2	31.2019	31.1511	0.0892288
15,09f	B2M	14.3091	14.8026	0.621522	LAMC2	31.0481	31.1511	0.0892288
15,09f	B2M	14.5981	14.8026	0.621522	LAMC2	31.2033	31.1511	0.0892288
19,09n	B2M	13.5728	14.3416	0.730127	LAMC2	33.209	33.1145	0.107359
19,09n	B2M	15.0257	14.3416	0.730127	LAMC2	33.1368	33.1145	0.107359
19,09n	B2M	14.4262	14.3416	0.730127	LAMC2	32.9978	33.1145	0.107359
19,09f	B2M	13.917	14.6509	0.660034	LAMC2	30.4182	30.3667	0.0678628
19,09f	B2M	14.8396	14.6509	0.660034	LAMC2	30.2898	30.3667	0.0678628
19,09f	B2M	15.1959	14.6509	0.660034	LAMC2	30.3922	30.3667	0.0678628
09,09n	B2M	15.8432	15.4536	0.339093	LAMC2	30.689	30.8232	0.126617
09,09n	B2M	15.2923	15.4536	0.339093	LAMC2	30.84	30.8232	0.126617
09,09n	B2M	15.2252	15.4536	0.339093	LAMC2	30.9406	30.8232	0.126617
09,09f	B2M	15.5771	14.5597	0.959027	LAMC2	31.2266	31.2769	0.056818
09,09f	B2M	14.4298	14.5597	0.959027	LAMC2	31.3385	31.2769	0.056818
09,09f	B2M	13.6723	14.5597	0.959027	LAMC2	31.2656	31.2769	0.056818
30,07n	B2M	14.3684	14.4207	0.274561	LAMC2	31.6498	31.5105	0.130339
30,07n	B2M	14.1761	14.4207	0.274561	LAMC2	31.4901	31.5105	0.130339
30,07n	B2M	14.7177	14.4207	0.274561	LAMC2	31.3916	31.5105	0.130339
30,07f	B2M	15.0729	14.8806	0.168004	LAMC2	31.4038	31.3884	0.188481
30,07f	B2M	14.8063	14.8806	0.168004	LAMC2	31.5687	31.3884	0.188481
30,07f	B2M	14.7625	14.8806	0.168004	LAMC2	31.1926	31.3884	0.188481
B2M-neg	B2M	Undetermined
LAMC2-neg	LAMC2	Undetermined

## Sheet: NOVA1 Raw Data
Sample Name	Target Name	Cт	Cт Mean	Cт SD	Target Name	Cт	Cт Mean	Cт SD
22.05.n	B2M	21.1906	21.0188	0.149106	NOVA1	32.8945	32.7962	0.233249
22.05.n	B2M	20.9233	21.0188	0.149106	NOVA1	32.9643	32.7962	0.233249
22.05.n	B2M	20.9425	21.0188	0.149106	NOVA1	32.5299	32.7962	0.233249
22.05.f	B2M	21.8523	21.6733	0.158811	NOVA1	31.1539	31.0483	0.0916578
22.05.f	B2M	21.6183	21.6733	0.158811	NOVA1	30.9897	31.0483	0.0916578
22.05.f	B2M	21.5493	21.6733	0.158811	NOVA1	31.0012	31.0483	0.0916578
07.08.n	B2M	21.1642	21.0922	0.0629835	NOVA1	32.772	32.8575	0.078338
07.08.n	B2M	21.0473	21.0922	0.0629835	NOVA1	32.8746	32.8575	0.078338
07.08.n	B2M	21.0651	21.0922	0.0629835	NOVA1	32.9258	32.8575	0.078338
07.08.f	B2M	21.1847	21.2821	0.0869718	NOVA1	32.7426	32.5468	0.170102
07.08.f	B2M	21.3521	21.2821	0.0869718	NOVA1	32.4355	32.5468	0.170102
07.08.f	B2M	21.3095	21.2821	0.0869718	NOVA1	32.4623	32.5468	0.170102
14.08.n	B2M	20.814	20.7478	0.0596084	NOVA1	32.7619	32.6445	0.110481
14.08.n	B2M	20.7312	20.7478	0.0596084	NOVA1	32.5425	32.6445	0.110481
14.08.n	B2M	20.6983	20.7478	0.0596084	NOVA1	32.6291	32.6445	0.110481
14.08.f	B2M	20.5456	20.5357	0.0557511	NOVA1	32.5466	32.6307	0.189076
14.08.f	B2M	20.5858	20.5357	0.0557511	NOVA1	32.8473	32.6307	0.189076
14.08.f	B2M	20.4756	20.5357	0.0557511	NOVA1	32.4984	32.6307	0.189076
18.08.n	B2M	20.1045	19.9224	0.166375	NOVA1	32.008	32.0215	0.0703925
18.08.n	B2M	19.7784	19.9224	0.166375	NOVA1	31.9589	32.0215	0.0703925
18.08.n	B2M	19.8843	19.9224	0.166375	NOVA1	32.0977	32.0215	0.0703925
18.08.f	B2M	19.9735	20.009	0.0560943	NOVA1	32.1896	32.0432	0.127317
18.08.f	B2M	19.9799	20.009	0.0560943	NOVA1	31.9588	32.0432	0.127317
18.08.f	B2M	20.0737	20.009	0.0560943	NOVA1	31.9811	32.0432	0.127317
22.08.n	B2M	20.3547	20.2826	0.0624504	NOVA1	33.6122	33.3922	0.281182
22.08.n	B2M	20.2454	20.2826	0.0624504	NOVA1	33.4891	33.3922	0.281182
22.08.n	B2M	20.2477	20.2826	0.0624504	NOVA1	33.0754	33.3922	0.281182
5425II	B2M	20.5394	20.4308	0.293254	NOVA1	32.4099	32.3035	0.19813
5425II	B2M	20.0988	20.4308	0.293254	NOVA1	32.0749	32.3035	0.19813
5425II	B2M	20.6543	20.4308	0.293254	NOVA1	32.4258	32.3035	0.19813
26.08.n	B2M	20.2815	20.1635	0.16543	NOVA1	32.5769	32.7141	0.120994
26.08.n	B2M	20.2347	20.1635	0.16543	NOVA1	32.8053	32.7141	0.120994
26.08.n	B2M	19.9744	20.1635	0.16543	NOVA1	32.7603	32.7141	0.120994
26.08.f	B2M	20.1676	20.2197	0.0777567	NOVA1	32.5724	32.4653	0.111739
26.08.f	B2M	20.1824	20.2197	0.0777567	NOVA1	32.3494	32.4653	0.111739
26.08.f	B2M	20.309	20.2197	0.0777567	NOVA1	32.4739	32.4653	0.111739
04.09.n	B2M	20.4853	20.4125	0.113209	NOVA1	32.5571	32.4392	0.152028
04.09.n	B2M	20.4701	20.4125	0.113209	NOVA1	32.4929	32.4392	0.152028
04.09.n	B2M	20.282	20.4125	0.113209	NOVA1	32.2677	32.4392	0.152028
04.09.f	B2M	20.66	20.4998	0.317269	NOVA1	31.9401	31.8454	0.152259
04.09.f	B2M	20.1344	20.4998	0.317269	NOVA1	31.9265	31.8454	0.152259
04.09.f	B2M	20.705	20.4998	0.317269	NOVA1	31.6698	31.8454	0.152259
09.09.f	B2M	20.5179	20.8478	0.368271	NOVA1	32.2871	32.0858	0.158055
09.09.f	B2M	20.6537	20.8478	0.368271	NOVA1	32.1633	32.0858	0.158055
09.09.f	B2M	20.3919	20.8478	0.368271	NOVA1	32.2193	32.0858	0.158055
09.09.f	B2M	21.2123	20.8478	0.368271	NOVA1	31.9683	32.0858	0.158055
09.09.f	B2M	21.1256	20.8478	0.368271	NOVA1	31.898	32.0858	0.158055
09.09.f	B2M	21.1851	20.8478	0.368271	NOVA1	31.9786	32.0858	0.158055
30.07.n	B2M	20.0851	20.1302	0.0512937	NOVA1	33.3482	33.478	0.113759
30.07.n	B2M	20.186	20.1302	0.0512937	NOVA1	33.5259	33.478	0.113759
30.07.n	B2M	20.1195	20.1302	0.0512937	NOVA1	33.5601	33.478	0.113759
30.07.f	B2M	20.1701	20.2102	0.172707	NOVA1	31.6352	31.6104	0.0430668
30.07.f	B2M	20.0611	20.2102	0.172707	NOVA1	31.5607	31.6104	0.0430668
30.07.f	B2M	20.3995	20.2102	0.172707	NOVA1	31.6355	31.6104	0.0430668
neg	B2M	Undetermined
neg	NOVA1	Undetermined
29.04.n	B2M	21.2171	21.1033	0.100805	NOVA1	32.9418	32.7667	0.167673
29.04.n	B2M	21.0677	21.1033	0.100805	NOVA1	32.7507	32.7667	0.167673
29.04.n	B2M	21.0252	21.1033	0.100805	NOVA1	32.6076	32.7667	0.167673
29.04.f	B2M	21.3758	21.386	0.0478787	NOVA1	32.2027	31.968	0.223892
29.04.f	B2M	21.344	21.386	0.0478787	NOVA1	31.7568	31.968	0.223892
29.04.f	B2M	21.4381	21.386	0.0478787	NOVA1	31.9445	31.968	0.223892
11.07.n	B2M	20.3444	20.2388	0.0917044	NOVA1	31.8633	31.8543	0.0266826
11.07.n	B2M	20.18	20.2388	0.0917044	NOVA1	31.8243	31.8543	0.0266826
11.07.n	B2M	20.1918	20.2388	0.0917044	NOVA1	31.8753	31.8543	0.0266826
11.07.f	B2M	20.8546	20.9052	0.0465417	NOVA1	31.9903	31.9741	0.0140643
11.07.f	B2M	20.9148	20.9052	0.0465417	NOVA1	31.9649	31.9741	0.0140643
11.07.f	B2M	20.9462	20.9052	0.0465417	NOVA1	31.9672	31.9741	0.0140643
20.08.n	B2M	21.3602	21.2284	0.12317	NOVA1	32.2029	31.9879	0.194242
20.08.n	B2M	21.2087	21.2284	0.12317	NOVA1	31.9355	31.9879	0.194242
20.08.n	B2M	21.1162	21.2284	0.12317	NOVA1	31.8252	31.9879	0.194242
20.08.f	B2M	20.1472	20.1088	0.0462922	NOVA1	30.941	31.0013	0.0647212
20.08.f	B2M	20.1218	20.1088	0.0462922	NOVA1	30.9933	31.0013	0.0647212
20.08.f	B2M	20.0574	20.1088	0.0462922	NOVA1	31.0696	31.0013	0.0647212
15.09.n	B2M	20.718	20.5199	0.181218	NOVA1	32.5353	32.5166	0.038714
15.09.n	B2M	20.3624	20.5199	0.181218	NOVA1	32.4721	32.5166	0.038714
15.09.n	B2M	20.4794	20.5199	0.181218	NOVA1	32.5424	32.5166	0.038714
15.09.f	B2M	20.9556	20.7777	0.161842	NOVA1	31.9949	31.9435	0.0585035
15.09.f	B2M	20.6393	20.7777	0.161842	NOVA1	31.9556	31.9435	0.0585035
15.09.f	B2M	20.7381	20.7777	0.161842	NOVA1	31.8798	31.9435	0.0585035
19.09.n	B2M	20.1929	20.0726	0.105522	NOVA1	34.9441	34.9478	0.0128488
19.09.n	B2M	19.9956	20.0726	0.105522	NOVA1	34.962	34.9478	0.0128488
19.09.n	B2M	20.0293	20.0726	0.105522	NOVA1	34.9371	34.9478	0.0128488
19.09.f	B2M	19.8647	19.8996	0.0579644	NOVA1	31.9837	31.901	0.141127
19.09.f	B2M	19.9665	19.8996	0.0579644	NOVA1	31.7381	31.901	0.141127
19.09.f	B2M	19.8675	19.8996	0.0579644	NOVA1	31.9812	31.901	0.141127
neg	B2M	Undetermined
neg	NOVA1	Undetermined

## Sheet: L1CAM Raw Data
Sample Name	Target Name	Cт	Cт Mean	Cт SD	Target Name	Cт	Cт Mean	Cт SD
22.05.n	B2M	20.9335	20.8011	0.120429	L1CAM	32.7188	32.5476	0.18836
22.05.n	B2M	20.7717	20.8011	0.120429	L1CAM	32.5783	32.5476	0.18836
22.05.n	B2M	20.6981	20.8011	0.120429	L1CAM	32.3459	32.5476	0.18836
22.05.f	B2M	21.6439	21.637	0.0803525	L1CAM	33.6955	33.7412	0.0952819
22.05.f	B2M	21.7479	21.637	0.0803525	L1CAM	33.8508	33.7412	0.0952819
22.05.f	B2M	21.5721	21.637	0.0803525	L1CAM	33.6775	33.7412	0.0952819
07.08.n	B2M	20.9123	20.8966	0.0194148	L1CAM	33.5175	33.6202	0.122106
07.08.n	B2M	20.9026	20.8966	0.0194148	L1CAM	33.5879	33.6202	0.122106
07.08.n	B2M	20.8749	20.8966	0.0194148	L1CAM	33.7552	33.6202	0.122106
07.08.f	B2M	21.063	21.0981	0.0507477	L1CAM	32.6684	32.6924	0.0889541
07.08.f	B2M	21.075	21.0981	0.0507477	L1CAM	32.791	32.6924	0.0889541
07.08.f	B2M	21.1563	21.0981	0.0507477	L1CAM	32.618	32.6924	0.0889541
14.08.n	B2M	20.6702	20.5595	0.0959599	L1CAM	32.8375	32.6902	0.13446
14.08.n	B2M	20.5085	20.5595	0.0959599	L1CAM	32.5741	32.6902	0.13446
14.08.n	B2M	20.4999	20.5595	0.0959599	L1CAM	32.6589	32.6902	0.13446
14.08.f	B2M	20.3972	20.36	0.109037	L1CAM	31.6768	31.8306	0.141312
14.08.f	B2M	20.4456	20.36	0.109037	L1CAM	31.8604	31.8306	0.141312
14.08.f	B2M	20.2373	20.36	0.109037	L1CAM	31.9547	31.8306	0.141312
18.08.n	B2M	19.7473	19.6821	0.115629	L1CAM	31.9314	31.9713	0.0558351
18.08.n	B2M	19.5486	19.6821	0.115629	L1CAM	31.9474	31.9713	0.0558351
18.08.n	B2M	19.7505	19.6821	0.115629	L1CAM	32.0351	31.9713	0.0558351
18.08.f	B2M	19.6792	19.6995	0.0759545	L1CAM	31.5461	31.6284	0.081261
18.08.f	B2M	19.6357	19.6995	0.0759545	L1CAM	31.7086	31.6284	0.081261
18.08.f	B2M	19.7835	19.6995	0.0759545	L1CAM	31.6305	31.6284	0.081261
22.08.n	B2M	20.2423	20.1519	0.0797972	L1CAM	31.8333	31.8563	0.0383011
22.08.n	B2M	20.0915	20.1519	0.0797972	L1CAM	31.8352	31.8563	0.0383011
22.08.n	B2M	20.1217	20.1519	0.0797972	L1CAM	31.9006	31.8563	0.0383011
5425II	B2M	20.4391	20.3813	0.0680154	L1CAM	33.3304	33.202	0.125944
5425II	B2M	20.3063	20.3813	0.0680154	L1CAM	33.0787	33.202	0.125944
5425II	B2M	20.3984	20.3813	0.0680154	L1CAM	33.1968	33.202	0.125944
26.08.n	B2M	19.5839	19.864	0.244684	L1CAM	32.6517	32.7415	0.0780469
26.08.n	B2M	20.0363	19.864	0.244684	L1CAM	32.7806	32.7415	0.0780469
26.08.n	B2M	19.9717	19.864	0.244684	L1CAM	32.7923	32.7415	0.0780469
26.08.f	B2M	19.9615	19.9061	0.0654154	L1CAM	32.4761	32.4732	0.0962353
26.08.f	B2M	19.8339	19.9061	0.0654154	L1CAM	32.568	32.4732	0.0962353
26.08.f	B2M	19.923	19.9061	0.0654154	L1CAM	32.3756	32.4732	0.0962353
04.09.n	B2M	20.3323	20.2661	0.0592148	L1CAM	32.8822	32.9085	0.036258
04.09.n	B2M	20.2182	20.2661	0.0592148	L1CAM	32.9499	32.9085	0.036258
04.09.n	B2M	20.2479	20.2661	0.0592148	L1CAM	32.8934	32.9085	0.036258
04.09.f	B2M	20.5802	20.4109	0.261644	L1CAM	31.1233	31.143	0.0522033
04.09.f	B2M	20.1095	20.4109	0.261644	L1CAM	31.1036	31.143	0.0522033
04.09.f	B2M	20.5429	20.4109	0.261644	L1CAM	31.2022	31.143	0.0522033
09.09.n	B2M	20.1912	20.3978	0.183762	L1CAM	32.3348	32.5257	0.179113
09.09.n	B2M	20.5429	20.3978	0.183762	L1CAM	32.5521	32.5257	0.179113
09.09.n	B2M	20.4594	20.3978	0.183762	L1CAM	32.6901	32.5257	0.179113
09.09f	B2M	21.2621	21.1418	0.111191	L1CAM	32.3399	32.2479	0.109637
09.09f	B2M	21.0428	21.1418	0.111191	L1CAM	32.1266	32.2479	0.109637
09.09f	B2M	21.1205	21.1418	0.111191	L1CAM	32.2772	32.2479	0.109637
30.07.n	B2M	20.0698	20.0404	0.0255302	L1CAM	32.8265	32.9147	0.0764746
30.07.n	B2M	20.0278	20.0404	0.0255302	L1CAM	32.9553	32.9147	0.0764746
30.07.n	B2M	20.0236	20.0404	0.0255302	L1CAM	32.9624	32.9147	0.0764746
30.07.f	B2M	20.2405	20.2485	0.102758	L1CAM	31.3483	31.3218	0.0236827
30.07.f	B2M	20.15	20.2485	0.102758	L1CAM	31.3026	31.3218	0.0236827
30.07.f	B2M	20.3551	20.2485	0.102758	L1CAM	31.3146	31.3218	0.0236827
neg	B2M	Undetermined
neg	L1CAM	Undetermined
29.04.n	B2M	21.2386	21.1027	0.117915	L1CAM	33.2334	33.2657	0.0975169
29.04.n	B2M	21.0418	21.1027	0.117915	L1CAM	33.3753	33.2657	0.0975169
29.04.n	B2M	21.0277	21.1027	0.117915	L1CAM	33.1885	33.2657	0.0975169
29.04.f	B2M	21.4019	21.419	0.112297	L1CAM	32.1008	32.0088	0.0950849
29.04.f	B2M	21.5388	21.419	0.112297	L1CAM	31.9109	32.0088	0.0950849
29.04.f	B2M	21.3162	21.419	0.112297	L1CAM	32.0147	32.0088	0.0950849
11.07.n	B2M	20.3459	20.2549	0.0955747	L1CAM	31.5218	31.4353	0.122852
11.07.n	B2M	20.1553	20.2549	0.0955747	L1CAM	31.2947	31.4353	0.122852
11.07.n	B2M	20.2635	20.2549	0.0955747	L1CAM	31.4894	31.4353	0.122852
11.07.f	B2M	20.8588	20.8899	0.0479625	L1CAM	32.0809	31.97	0.0997196
11.07.f	B2M	20.8657	20.8899	0.0479625	L1CAM	31.9413	31.97	0.0997196
11.07.f	B2M	20.9451	20.8899	0.0479625	L1CAM	31.8878	31.97	0.0997196
20.08.n	B2M	21.2158	21.1364	0.0746838	L1CAM	32.3873	32.2519	0.119434
20.08.n	B2M	21.1259	21.1364	0.0746838	L1CAM	32.1615	32.2519	0.119434
20.08.n	B2M	21.0676	21.1364	0.0746838	L1CAM	32.2068	32.2519	0.119434
20.08.f	B2M	20.1183	20.0983	0.0373497	L1CAM	30.914	30.9914	0.0671782
20.08.f	B2M	20.1214	20.0983	0.0373497	L1CAM	31.0334	30.9914	0.0671782
20.08.f	B2M	20.0552	20.0983	0.0373497	L1CAM	31.0269	30.9914	0.0671782
15.09.n	B2M	20.6407	20.4536	0.210849	L1CAM	31.6936	31.7702	0.079438
15.09.n	B2M	20.2251	20.4536	0.210849	L1CAM	31.8522	31.7702	0.079438
15.09.n	B2M	20.4949	20.4536	0.210849	L1CAM	31.7649	31.7702	0.079438
15.09.f	B2M	20.8332	20.7115	0.121591	L1CAM	31.9591	31.8038	0.135517
15.09.f	B2M	20.59	20.7115	0.121591	L1CAM	31.7426	31.8038	0.135517
15.09.f	B2M	20.7112	20.7115	0.121591	L1CAM	31.7097	31.8038	0.135517
19.09.n	B2M	20.1697	20.0778	0.0904392	L1CAM	34.5717	34.2717	0.306335
19.09.n	B2M	20.075	20.0778	0.0904392	L1CAM	34.284	34.2717	0.306335
19.09.n	B2M	19.9889	20.0778	0.0904392	L1CAM	33.9594	34.2717	0.306335
19.09.f	B2M	19.7847	19.7733	0.0598462	L1CAM	32.2645	32.2501	0.186446
19.09.f	B2M	19.7085	19.7733	0.0598462	L1CAM	32.0569	32.2501	0.186446
19.09.f	B2M	19.8265	19.7733	0.0598462	L1CAM	32.4289	32.2501	0.186446
neg	B2M	Undetermined
neg	L1CAM	Undetermined

## Sheet: IGFBP5 RawData
Sample Name	Target Name	Cт	Cт Mean	Cт SD	Target Name	Cт	Cт Mean	Cт SD
22.05.n	B2M	20.8058	20.6976	0.224138	IGFBP5	28.9201	28.8826	0.112153
22.05.n	B2M	20.4399	20.6976	0.224138	IGFBP5	28.9712	28.8826	0.112153
22.05.n	B2M	20.8472	20.6976	0.224138	IGFBP5	28.7565	28.8826	0.112153
22.05.f	B2M	21.6003	21.5532	0.111783	IGFBP5	26.3245	26.3282	0.04868
22.05.f	B2M	21.4255	21.5532	0.111783	IGFBP5	26.2815	26.3282	0.04868
22.05.f	B2M	21.6336	21.5532	0.111783	IGFBP5	26.3787	26.3282	0.04868
07.08.n	B2M	20.6043	20.8258	0.192019	IGFBP5	26.6825	27.0376	0.310828
07.08.n	B2M	20.9275	20.8258	0.192019	IGFBP5	27.17	27.0376	0.310828
07.08.n	B2M	20.9456	20.8258	0.192019	IGFBP5	27.2603	27.0376	0.310828
07.08.f	B2M	21.0499	21.0748	0.144098	IGFBP5	26.7881	26.8603	0.0686263
07.08.f	B2M	20.9448	21.0748	0.144098	IGFBP5	26.868	26.8603	0.0686263
07.08.f	B2M	21.2298	21.0748	0.144098	IGFBP5	26.9247	26.8603	0.0686263
14.08.n	B2M	20.661	20.5072	0.192185	IGFBP5	27.8484	27.7341	0.103447
14.08.n	B2M	20.2918	20.5072	0.192185	IGFBP5	27.707	27.7341	0.103447
14.08.n	B2M	20.5689	20.5072	0.192185	IGFBP5	27.647	27.7341	0.103447
14.08.f	B2M	20.3663	20.2802	0.216964	IGFBP5	28.2216	28.3269	0.0994847
14.08.f	B2M	20.4408	20.2802	0.216964	IGFBP5	28.3399	28.3269	0.0994847
14.08.f	B2M	20.0333	20.2802	0.216964	IGFBP5	28.4193	28.3269	0.0994847
18.08.n	B2M	19.9152	19.7303	0.299343	IGFBP5	27.8259	27.9014	0.0803344
18.08.n	B2M	19.3849	19.7303	0.299343	IGFBP5	27.9859	27.9014	0.0803344
18.08.n	B2M	19.8908	19.7303	0.299343	IGFBP5	27.8926	27.9014	0.0803344
18.08.f	B2M	19.4776	19.6391	0.269064	IGFBP5	24.267	24.2345	0.0524319
18.08.f	B2M	19.4901	19.6391	0.269064	IGFBP5	24.174	24.2345	0.0524319
18.08.f	B2M	19.9497	19.6391	0.269064	IGFBP5	24.2625	24.2345	0.0524319
22.08.n	B2M	20.1234	20.0614	0.181329	IGFBP5	29.2884	29.3094	0.10825
22.08.n	B2M	19.8572	20.0614	0.181329	IGFBP5	29.4266	29.3094	0.10825
22.08.n	B2M	20.2036	20.0614	0.181329	IGFBP5	29.2132	29.3094	0.10825
5425II	B2M	20.413	20.3259	0.237691	IGFBP5	26.8413	26.5473	0.424798
5425II	B2M	20.057	20.3259	0.237691	IGFBP5	26.0603	26.5473	0.424798
5425II	B2M	20.5078	20.3259	0.237691	IGFBP5	26.7404	26.5473	0.424798
26.08.n	B2M	19.5987	19.9039	0.33649	IGFBP5	28.9866	29.3815	0.34426
26.08.n	B2M	20.2647	19.9039	0.33649	IGFBP5	29.5391	29.3815	0.34426
26.08.n	B2M	19.8481	19.9039	0.33649	IGFBP5	29.6187	29.3815	0.34426
26.08.f	B2M	20.0983	20.0552	0.0392364	IGFBP5	28.1718	28.2333	0.0655676
26.08.f	B2M	20.0216	20.0552	0.0392364	IGFBP5	28.2258	28.2333	0.0655676
26.08.f	B2M	20.0456	20.0552	0.0392364	IGFBP5	28.3023	28.2333	0.0655676
04.09.n	B2M	20.1189	20.1416	0.129927	IGFBP5	28.693	28.6849	0.0429281
04.09.n	B2M	20.2813	20.1416	0.129927	IGFBP5	28.7232	28.6849	0.0429281
04.09.n	B2M	20.0244	20.1416	0.129927	IGFBP5	28.6385	28.6849	0.0429281
04.09.f	B2M	20.3945	20.3461	0.0565149	IGFBP5	28.5825	28.3068	0.2532
04.09.f	B2M	20.284	20.3461	0.0565149	IGFBP5	28.2534	28.3068	0.2532
04.09.f	B2M	20.3597	20.3461	0.0565149	IGFBP5	28.0846	28.3068	0.2532
09.09.n	B2M	20.6446	20.576	0.118032	IGFBP5	22.6598	22.8872	0.364436
09.09.n	B2M	20.6317	20.576	0.118032	IGFBP5	23.3075	22.8872	0.364436
09.09.n	B2M	20.6285	20.576	0.118032	IGFBP5	22.6943	22.8872	0.364436
09.09.f	B2M	21.0815	21.0828	0.00930864	IGFBP5	21.7799	22.3172	0.959271
09.09.f	B2M	21.0742	21.0828	0.00930864	IGFBP5	21.7471	22.3172	0.959271
09.09.f	B2M	21.0927	21.0828	0.00930864	IGFBP5	23.4247	22.3172	0.959271
30.07.n	B2M	20.0654	20.058	0.0326247	IGFBP5	22.3165	22.424	0.333487
30.07.n	B2M	20.0224	20.058	0.0326247	IGFBP5	22.798	22.424	0.333487
30.07.n	B2M	20.0864	20.058	0.0326247	IGFBP5	22.1575	22.424	0.333487
30.07.f	B2M	20.3159	20.2572	0.0970716	IGFBP5	22.2911	22.4927	0.558649
30.07.f	B2M	20.1452	20.2572	0.0970716	IGFBP5	23.1241	22.4927	0.558649
30.07.f	B2M	20.3105	20.2572	0.0970716	IGFBP5	22.0628	22.4927	0.558649
neg	IGFBP5	Undetermined
neg	B2M	Undetermined
29.04.n	B2M	21.2441	21.1056	0.12463	IGFBP5	23.7363	24.225	0.456743
29.04.n	B2M	21.0025	21.1056	0.12463	IGFBP5	24.6411	24.225	0.456743
29.04.n	B2M	21.0702	21.1056	0.12463	IGFBP5	24.2976	24.225	0.456743
29.04.f	B2M	21.4358	21.3979	0.056204	IGFBP5	21.751	21.182	0.662153
29.04.f	B2M	21.4246	21.3979	0.056204	IGFBP5	20.4552	21.182	0.662153
29.04.f	B2M	21.3333	21.3979	0.056204	IGFBP5	21.3399	21.182	0.662153
11.07.n	B2M	20.3478	20.187	0.162684	IGFBP5	22.249	22.8046	0.485798
11.07.n	B2M	20.0225	20.187	0.162684	IGFBP5	23.1497	22.8046	0.485798
11.07.n	B2M	20.1906	20.187	0.162684	IGFBP5	23.0149	22.8046	0.485798
11.07.f	B2M	20.7247	20.8386	0.10863	IGFBP5	23.9059	23.1089	0.707367
11.07.f	B2M	20.8499	20.8386	0.10863	IGFBP5	22.8652	23.1089	0.707367
11.07.f	B2M	20.9411	20.8386	0.10863	IGFBP5	22.5557	23.1089	0.707367
20.08.n	B2M	21.241	21.1389	0.0920622	IGFBP5	20.1844	21.2523	1.02604
20.08.n	B2M	21.1134	21.1389	0.0920622	IGFBP5	22.2307	21.2523	1.02604
20.08.n	B2M	21.0623	21.1389	0.0920622	IGFBP5	21.3416	21.2523	1.02604
20.08.f	B2M	20.1323	20.1434	0.0949212	IGFBP5	21.7987	22.5853	0.852704
20.08.f	B2M	20.2433	20.1434	0.0949212	IGFBP5	23.4915	22.5853	0.852704
20.08.f	B2M	20.0544	20.1434	0.0949212	IGFBP5	22.4658	22.5853	0.852704
15.09.n	B2M	20.5576	20.4777	0.072006	IGFBP5	23.7701	23.1911	0.8197
15.09.n	B2M	20.4179	20.4777	0.072006	IGFBP5	23.5501	23.1911	0.8197
15.09.n	B2M	20.4575	20.4777	0.072006	IGFBP5	22.2532	23.1911	0.8197
15.09.f	B2M	20.6864	20.6513	0.101075	IGFBP5	22.3204	21.2292	0.95403
15.09.f	B2M	20.5374	20.6513	0.101075	IGFBP5	20.5527	21.2292	0.95403
15.09.f	B2M	20.7302	20.6513	0.101075	IGFBP5	20.8145	21.2292	0.95403
19.09.n	B2M	20.0104	19.9897	0.0445464	IGFBP5	25.6848	26.3109	0.683168
19.09.n	B2M	20.0202	19.9897	0.0445464	IGFBP5	27.0395	26.3109	0.683168
19.09.n	B2M	19.9386	19.9897	0.0445464	IGFBP5	26.2084	26.3109	0.683168
19.09.f	B2M	19.8132	19.7943	0.0505489	IGFBP5	23.5593	22.5781	0.924931
19.09.f	B2M	19.737	19.7943	0.0505489	IGFBP5	21.7222	22.5781	0.924931
19.09.f	B2M	19.8326	19.7943	0.0505489	IGFBP5	22.4529	22.5781	0.924931
neg	B2M	Undetermined
neg	IGFBP5	Undetermined

[truncated: 40 more sheets: IGF1 Raw Data, LILRA5 Raw Data, FOXG1 Raw Data, LTF pN0 Wilcox, LTF pN1 Wilcox, LTF Auswertung, EREG pN0 Wilcox, EREG pN1 Wilcox, EREG Auswertung, LAMC2 pN0 Wilcox, LAMC2 pN1 Wilcox, LAMC2 Auswertung, TBX3 pN0 Wilcox, TBX3 pN1 Wilcox, TBX3 Auswertung, NOVA1 pN0 Wilcox, NOVA1 pN1 Wilcox, NOVA1 Auswertung, L1CAM pN0 Wilcox, L1CAM pN1 Wilcox …]
